# Supplementary material for: Nanoconfined self-assembly on a grafted graphitic surface under electrochemical control
Source: Royal Society of Chemistry journal article supplement (doi:10.1039/c6nr07519c), 2016-12-07
Supplement: c6nr07519c1.pdf [file c6nr07519c1.pdf]

## Nanoconfined self-assembly on a grafted graphitic surface under electrochemical control

Thi Mien Trung Huynh,<sup>a,b,†</sup> Thanh Hai Phan,<sup>a,c,†</sup> Oleksandr Ivashenko,<sup>a</sup> Stijn F. L. Mertens,<sup>a,d,\*</sup> Steven De Feyter<sup>\*a</sup>

<sup>a)</sup> Department of Chemistry, Division of Molecular Imaging and Photonics, KU Leuven-University of Leuven, Celestijnenlaan 200F, B-3001 Leuven, Belgium

<sup>b)</sup> Department of Chemistry, Quy Nhon University, 170 An Duong Vuong, Quy Nhon, Vietnam

<sup>c)</sup> Department of Physics, Quy Nhon University, 170 An Duong Vuong, Quy Nhon, Vietnam

<sup>d)</sup> Institute of Applied Physics, Vienna University of Technology, Wiedner Hauptstraße 8-10/E134, A-1040 Vienna, Austria

\* Corresponding authors: [huynhthimientrung@qnu.edu.vn](mailto:huynhthimientrung@qnu.edu.vn), [steven.defeyter@kuleuven.be](mailto:steven.defeyter@kuleuven.be), [stmerten@gmail.com](mailto:stmerten@gmail.com)

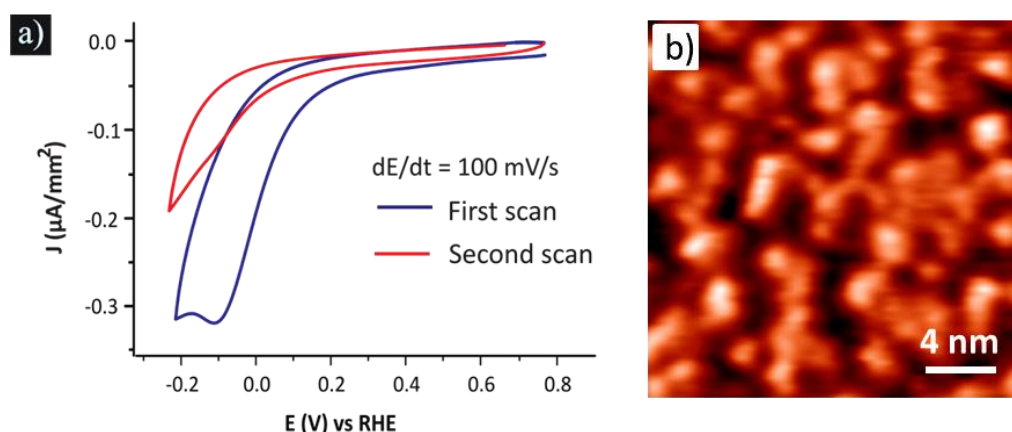

**Figure S1:** a) First two voltammetric cycles of HOPG in 2 mM 3,5-TBD + 50 mM HCl. The first scan (blue trace) shows an irreversible reduction peak at  $E = -96 \text{ mV}$  vs RHE. This peak is assigned to the reduction of the 3,5-TBD cations forming the corresponding radicals that immediately graft to the graphitic surface.<sup>1</sup> The second cycle (red trace) however, displays a featureless curve in the same potential regime. The disappearance of the well-defined reduction peak in the subsequent cycle is the result of the formation of a non-conductive grafted film at the interface that inhibits the electron transfer from the electrode surface to the 3,5-TBD cations; b) High resolution EC-STM images of HOPG surface covalently grafted by 3,5-TBD, substrate potential  $E = +147 \text{ mV}$  vs RHE,  $U_b = -179 \text{ mV}$ ,  $I_t = 0.2 \text{ nA}$ .

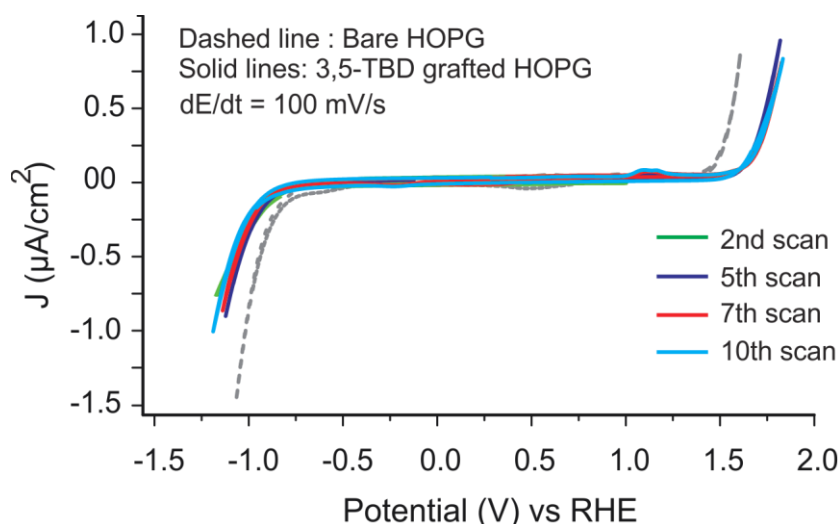

**Figure S2:** Multiple CV cycling on 3,5-TBD grafted HOPG showing the consistency of the onset of both OER and HER.

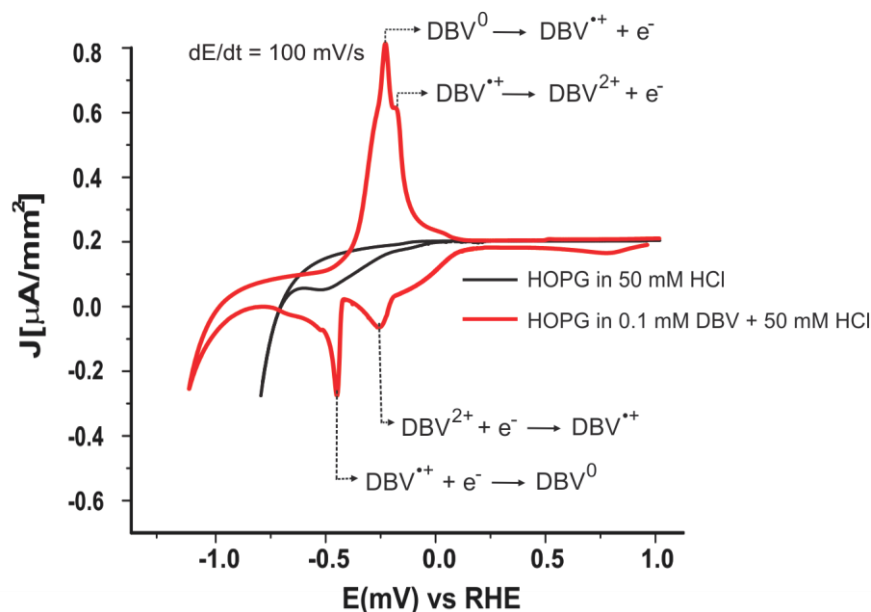

**Figure S3:** CVs of HOPG electrode in contact with 50 mM HCl (black curve) and 0.1 mM DBV + 50 mM HCl (red curve). The presence of DBV molecules leads to the appearance of two reduction peaks at  $E_1 = -280$  mV and  $E_2 = -450$  mV vs RHE that are assigned to the stepwise reduction from dicationic  $\text{DBV}^{2+}$  to the corresponding radical monocationic  $\text{DBV}^{\bullet+}$  and uncharged  $\text{DBV}^0$  species, respectively.

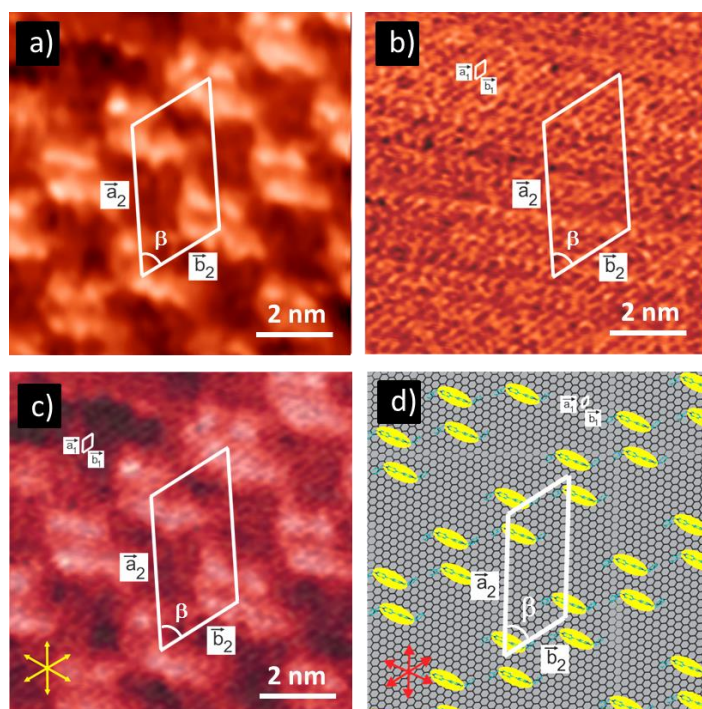

**Figure S4:** Structural correlation between the  $\text{DBV}^{\bullet+}$  layer in the dimer phase and the underlying HOPG lattice; a) ECSTM image of the molecule covered HOPG:  $E = -340$  mV,  $U_b = +200$  mV,  $I_t = 0.1$  nA; b) HOPG lattice underneath after the removal of the molecule:  $E = -340$  mV vs RHE,  $U_b = +10$  mV,  $I_t = 2.0$  nA; c) superposition of panels a and b; d) tentative model of the dimer phase forming on hexagonal HOPG surface including the unit cell is proposed with the lattice constants of  $|\vec{a}_2| = 2.6 \pm 0.4$  nm and  $|\vec{b}_2| = 1.6 \pm 0.4$  nm, respectively, enclosing an angle of  $\beta = 60 \pm 4^\circ$ .

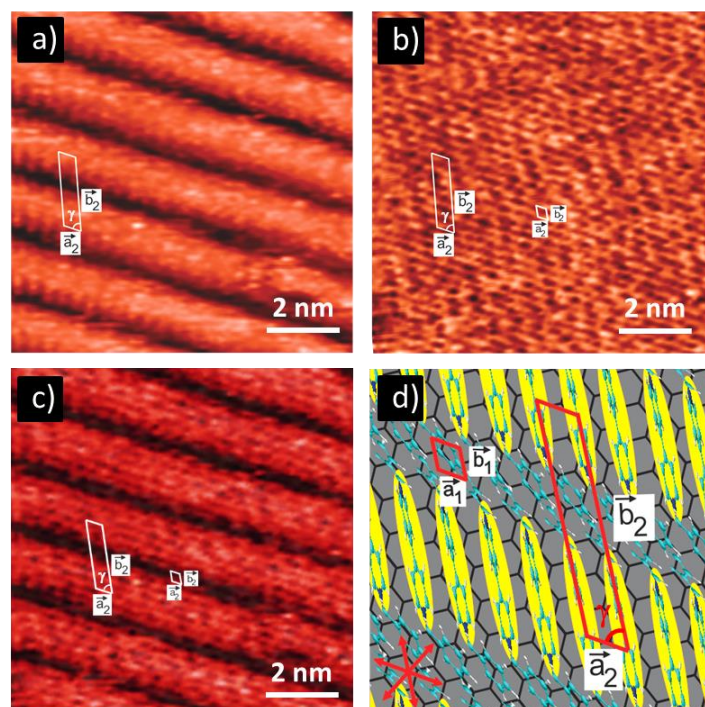

**Figure S5:** Structural correlation between the DBV<sup>0</sup> layer in the stacking phase and the underlying HOPG lattice, a) EC-STM image of the molecule covered HOPG:  $E = -510$  mV vs RHE,  $U_b = +350$  mV,  $I_t = 0.2$  nA; b) EC-STM image of the HOPG lattice underneath after the removal of the molecule:  $E = -510$  mV vs RHE,  $U_b = +20$  mV,  $I_t = 1.8$  nA; c) superposition of panels a and b; d) tentative model of the stacking phase forming on hexagonal HOPG surface. The unit cell of the DBV<sup>0</sup> adlayer is proposed with the lattice constants of  $|\vec{a}_2| = 0.6 \pm 0.4$  nm and  $|\vec{b}_2| = 2.5 \pm 0.4$  nm, respectively, enclosing an angle of  $\gamma = 59 \pm 4^\circ$

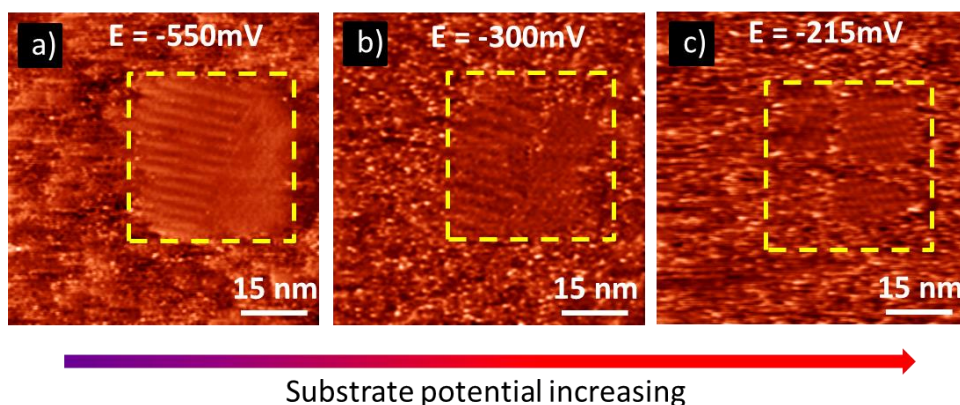

**Figure S6:** Dynamics of phase transition from the stacking phase to the dimer phase within nanocorrals:  $U_b = +120$  mV,  $I_t = 0.2$  nA

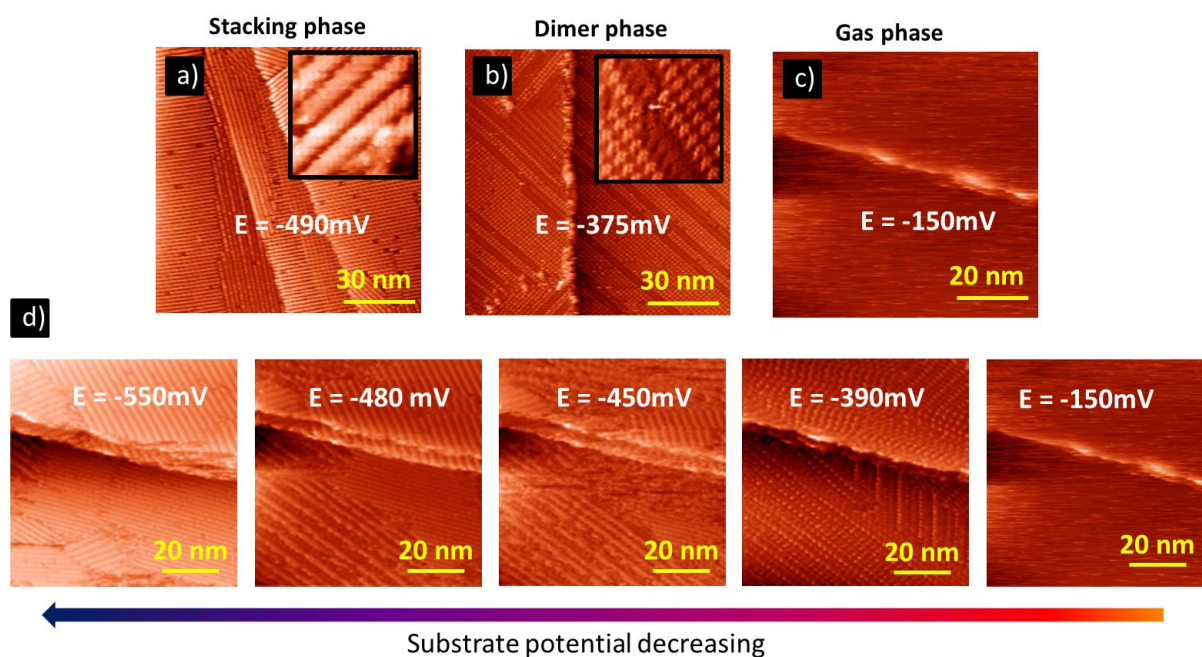

**Figure S7:** EC-STM images of (a) stacking phase, (b) dimer phase and (c) gas phase forming on bare HOPG at different electrode potentials indicated in the figures:  $U_b = +150\text{ mV}$ ,  $I_t = 0.1\text{ nA}$ ; c) dynamics of phase transition; the gas phase - the dimer phase - the stacking phase:  $U_b = +175\text{mV}$ ,  $I_t = 0.1\text{ nA}$ .

#### References

1. J. Greenwood, T. H. Phan, Y. Fujita, Z. Li, O. Ivasenko, W. Vanderlinden, H. Van Gorp, W. Frederickx, G. Lu, K. Tahara, Y. Tobe, H. Uji-i, S. F. L. Mertens and S. De Feyter, *ACS Nano*, 2015, **9**, 5520-5535.
